# Supplementary material for: MsYSL6, A Metal Transporter Gene of Alfalfa, Increases Iron Accumulation and Benefits Cadmium Resistance
Source: MDPI journal article supplement (doi:10.3390/plants12193485), 2023-10-05
Supplement: s1 [file s1]

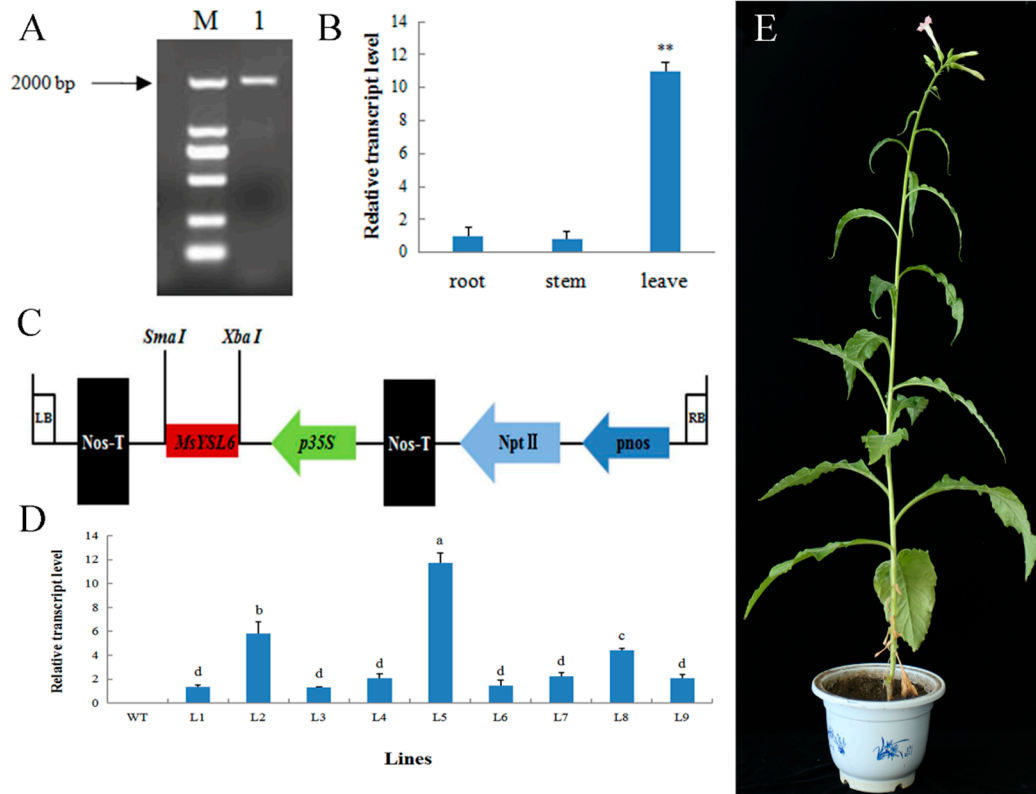

**Figure S1.** The cloning of *MsYSL6* from alfalfa and the transformation into tobacco. (A) The full-length of *MsYSL6* amplified by PCR from complementary DNA (cDNA) of alfalfa. M: DL 2000; 1: PCR product (*MsYSL6* CDS with 2,028 bp). (B) Construction of pBI121-*MsYSL6* vector. LB: T-DNA left border; RB: T-DNA right border; *p35S*: cauliflower mosaic virus promoter; *NptII*: Neomycin phosphotransferase II gene. (C) The transcript levels of *MsYSL6* in transgenic tobacco. Different letters represent significant differences ( $p < 0.05$ ). (D) The *MsYSL6* transgenic tobacco plant.

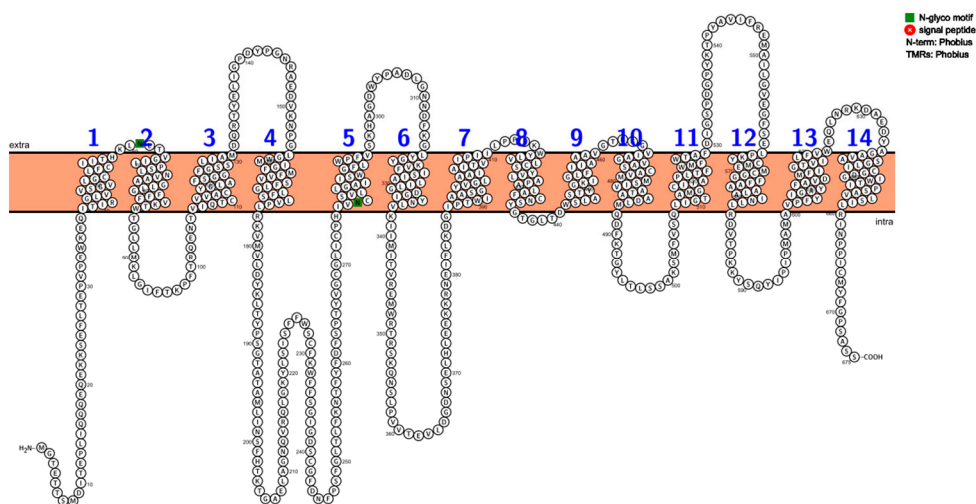

**Figure S2.** The predicted transmembrane domains of *MsYSL6* protein.

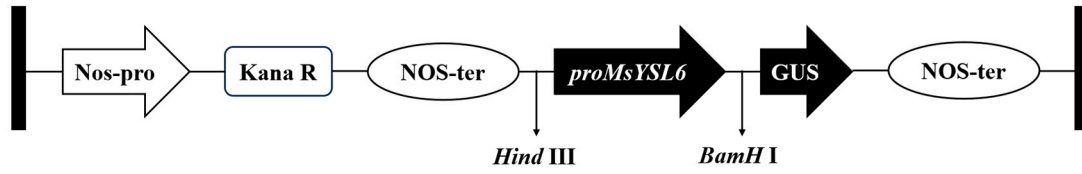

**Figure S3.** Construction of pBI121-MsYSL6pro::GUS.

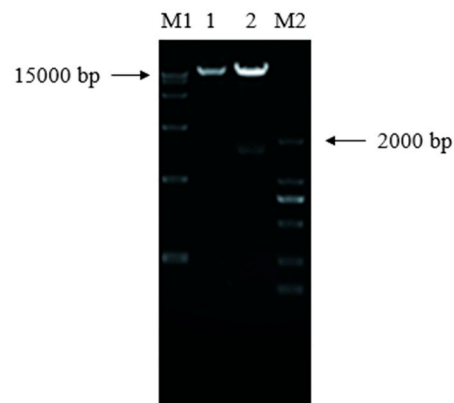

**Figure S4.** Identification of pBI121-MsYSL6pro::GUS. M1, Marker DL15000; M2, Marker DL2000; 1, pBI121-proMsYSL6::GUS; 2, Recombinant plasmid digested by BamH I, Hind III.

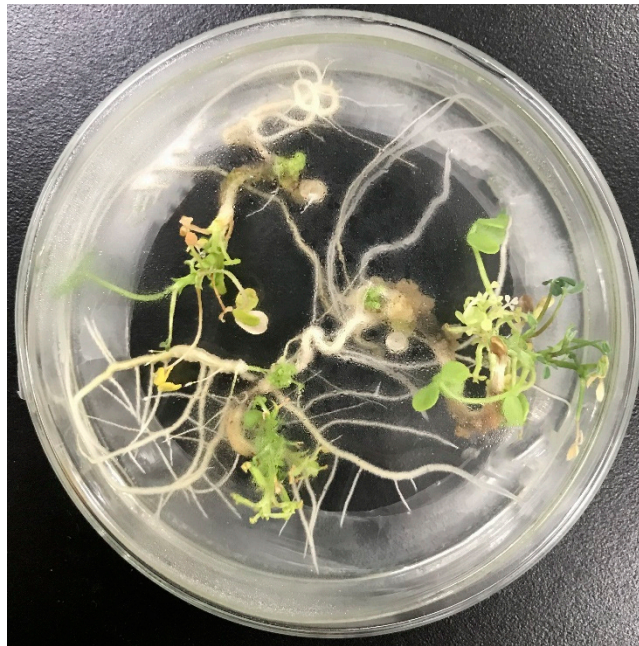

**Figure S5.** The pBI121-MsYSL6pro::GUS induced alfalfa hairy roots.

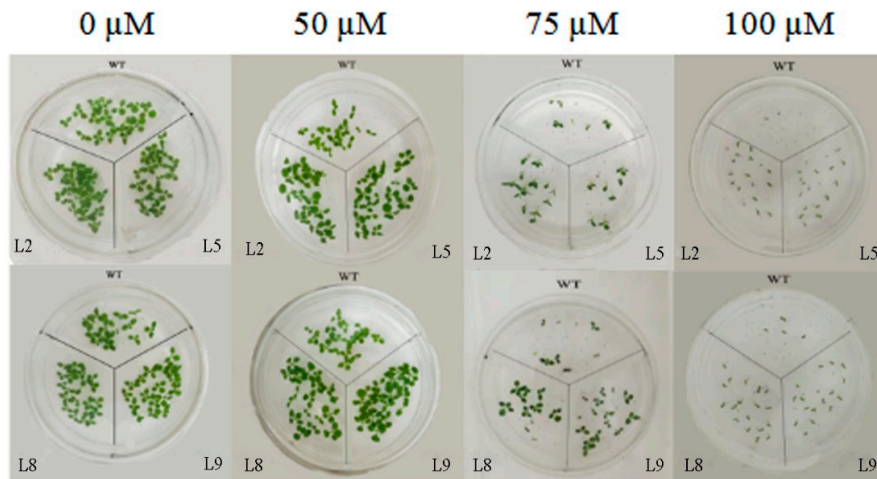

**Figure S6.** The germination of *MsYSL6OE* tobacco under Cd stress. The seeds of four *MsYSL6OE* lines (L2, L5, L8, and L9) and WT tobacco were germinated on a half-strength MS solid medium containing 0, 50, 75, 100  $\mu\text{M}$   $\text{CdCl}_2$ .

**Table S1.** The germination rates of *MsYSL6Ex* lines and WT under Cd stress.

| Line | Cd               |                   |                   |                   |
|------|------------------|-------------------|-------------------|-------------------|
|      | Control          | 50 $\mu\text{M}$  | 75 $\mu\text{M}$  | 100 $\mu\text{M}$ |
| WT   | 95.00 $\pm$ 0.05 | 75.00 $\pm$ 0.05  | 45.00 $\pm$ 0.05  | 26.67 $\pm$ 0.06  |
| L2   | 96.67 $\pm$ 0.03 | 83.33 $\pm$ 0.03* | 66.67 $\pm$ 0.03* | 53.33 $\pm$ 0.03* |
| L5   | 95.00 $\pm$ 0.05 | 83.33 $\pm$ 0.03* | 68.33 $\pm$ 0.03* | 55.00 $\pm$ 0.00* |
| L8   | 96.67 $\pm$ 0.03 | 83.33 $\pm$ 0.03* | 68.33 $\pm$ 0.03* | 55.00 $\pm$ 0.05* |
| L9   | 96.67 $\pm$ 0.03 | 83.33 $\pm$ 0.03* | 66.67 $\pm$ 0.03* | 50.00 $\pm$ 0.05* |

Note: \* $p < 0.05$ .

**Table S2.** The primer sequence.

| Primer Comments                   | Primer Sequence                    |
|-----------------------------------|------------------------------------|
| <i>MsYSL6</i> cloning             | F: ATGGGTACAGAAACA                 |
|                                   | R: TCAGCTGCTTGCGGAA                |
| qRT-PCR of <i>MsYSL6</i>          | F: CTCAGTCACAACGGGAAGG             |
|                                   | R: TGGAACAGCCACAGCAAT              |
| <i>MsYSL6pro</i> fragment cloning | F: CGGGATCCGCTATCTATTATGTGCTATCT   |
|                                   | R: CCAAGCTTGTTTGAGGTGAATCTGAG      |
| <i>MsNAS</i> gene cloning         | F: CGGGATCCTATAGAGATGATACCCACCCG   |
|                                   | R: GAAGATCTTGGATTGAATTGAAGTAATTTTA |

|                                   |                                                                        |
|-----------------------------------|------------------------------------------------------------------------|
| qRT-PCR of <i>MsNAS</i>           | F: AAGATTGTGGCTTCGGAT<br>R: TTCACTCCTACGCATACCA                        |
| <i>MsNAS</i> pro fragment cloning | F: GGGATCC TATAGAGATGATACCCACCCG<br>R: GAAGATCTTGGATTGAATTGAAGTAATTTTA |
| <i>MsACTIN</i>                    | F: ACGAGCGTTTCAGATG<br>R: ACCTCCGATCCAGACA                             |
| <i>NtGAPDH</i>                    | F: TAAGGGTGGTGCCAAGAAGGT<br>R: AGCAAGAGGAGCAAGGCACTT                   |
